# Supplementary material for: Identification of cellular microRNA-136 as a dual regulator of RIG-I-mediated innate immunity that antagonizes H5N1 IAV replication in A549 cells
Source: PubMed Central journal article supplement (PMC4598873; doi:10.1038/srep14991), 2015-10-09
Supplement: srep14991-s1.pdf [file srep14991-s1.pdf]

**Identification of cellular microRNA-136 as a dual regulator of RIG-I-mediated innate immunity that antagonizes H5N1 IAV replication in A549 cells**

Lianzhong Zhao, Jiping Zhu, Hongbo Zhou, Zongzheng Zhao, Zhong Zou, Xiaokun Liu, Xian Lin,

Xue Zhang, Xuexia Deng, Ruifang Wang, Huanchun Chen and Meilin Jin

Supplementary materials

Supplementary Figure S1

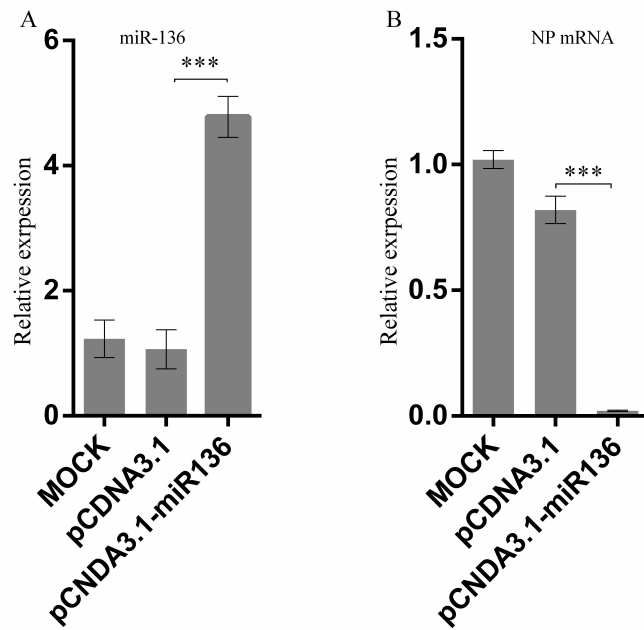

**Supplementary Figure S1.** Plasmid-based overexpression of miR136 reduced H5NA/HM NP mRNA abundance. (A) miR-136 expression level was detected in 12-well planted cells transfected with an amount of 1  $\mu$ g pCDNA3.1-miR136, compared with that of pCDNA3.1 empty vector (1  $\mu$ g) or mock transfection. (B) 12-well cells were transfected by the same procedure as above. After 24 hours transfection, cells then infected with H5N1/HM at an MOI of 0.2. Viral NP mRNA was evaluated by RT-qPCR at 24 hours post-infection. Results are presented as mean  $\pm$  SD of 3 independent experiments. \*\*\* $P < 0.001$ , as determined by one-way ANOVA with Bonferroni's multiple comparison test.

Supplementary Figure S2

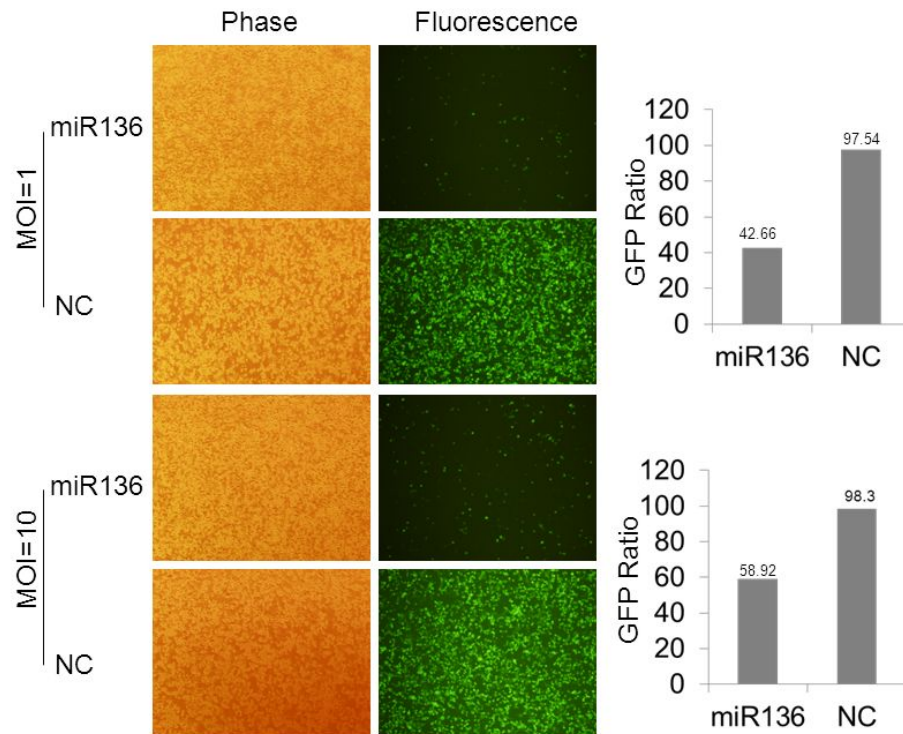

**Supplementary Figure S2.** A549 cells were transfected with a 60 nM concentration of miR-136 or NC.

After a 24-hour transfection period, cells were infected for 24 hours with VSV-eGFP (MOI = 1 or 10).

Microphotographs were taken, and the cells were analysed by flow cytometry to study GFP expression.

The presented image is a representative result from three separate experiments.

Supplementary Figure S3

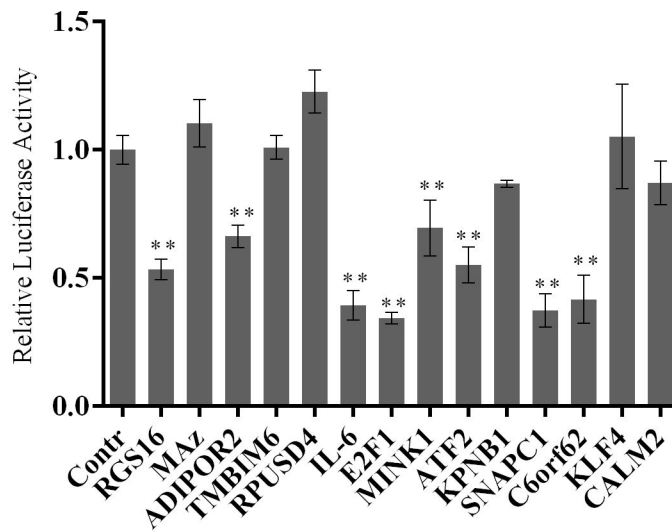

**Supplementary Figure S3.** miR-136 target analysis in 293T cells, using luciferase reporter assays.

293T cells were cotransfected with miR-136 and reporter constructs encoding the 3'UTRs of candidate genes, and luciferase reporter assays were performed at 24 hours post-transfection. The mean luciferase activity of control cells that were cotransfected with pCDNA3.1-miR136 and the empty reporter plasmid was set to a value of 1 for normalization purposes. Data are expressed as mean  $\pm$  SD (n = 3).

\*\*P < 0.01, as determined by one-way ANOVA with Bonferroni's multiple comparison test.

Supplementary Figure S4

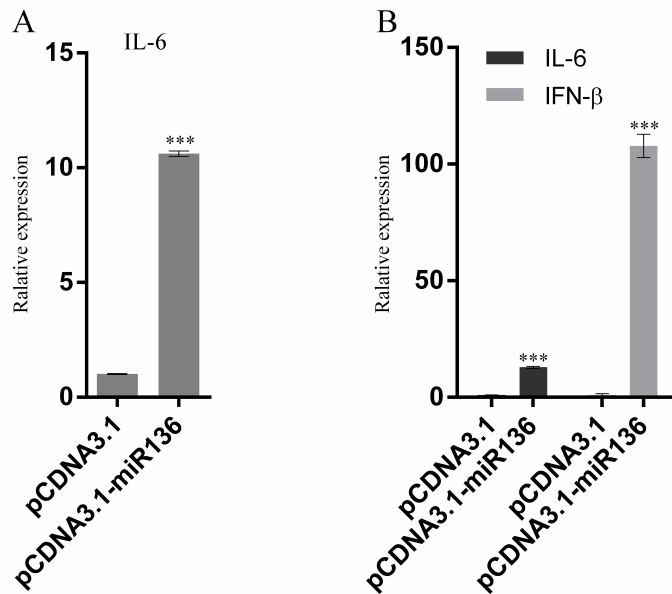

**Supplementary Figure S4.** Plasmid-expressed miR136 elevated both IL-6 and IFN- $\beta$  expression in A549 cells. A549 cells were transfected with 1  $\mu$ g pCDNA3.1-miR136 or empty vector. (A, B) IL-6 and IFN- $\beta$  mRNA expression level was determined by RT-qPCR at 24 hours post-transfection. Bar graph data are presented as mean  $\pm$  SD (n = 3). \*\*\*P < 0.001, as determined by performing a Student's t test.

Supplementary Figure S5

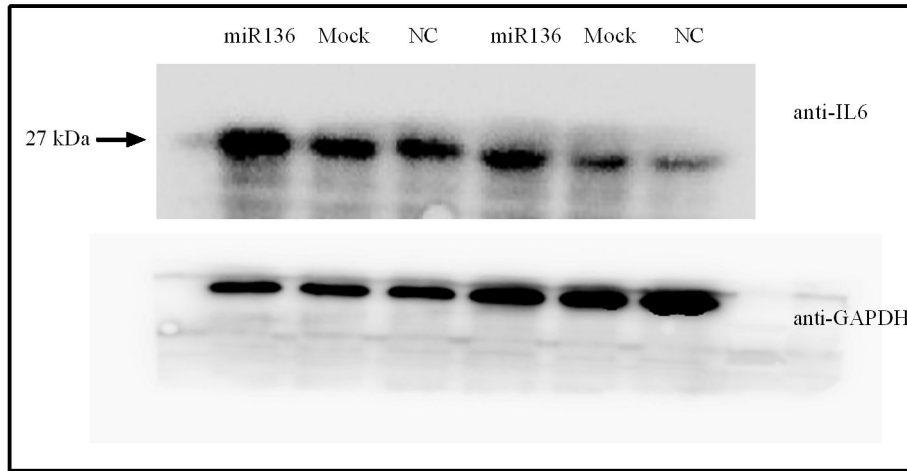

Supplementary Figure S6

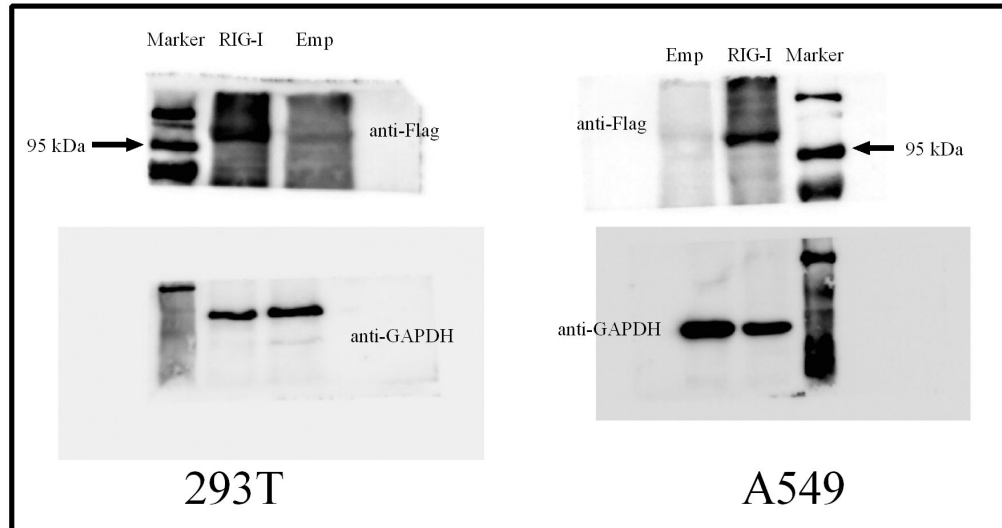

Supplementary Figure S7

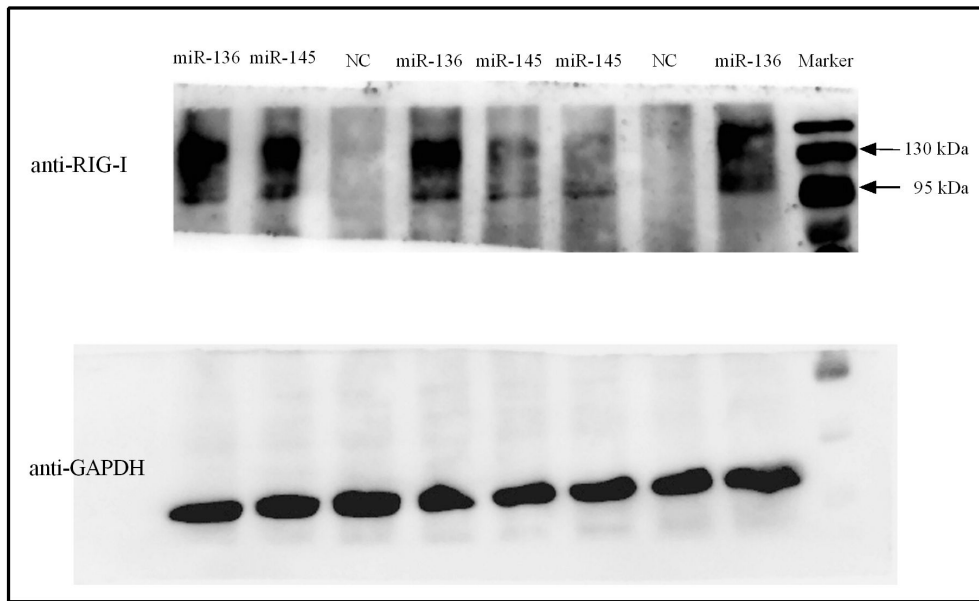

Supplementary Figure S8

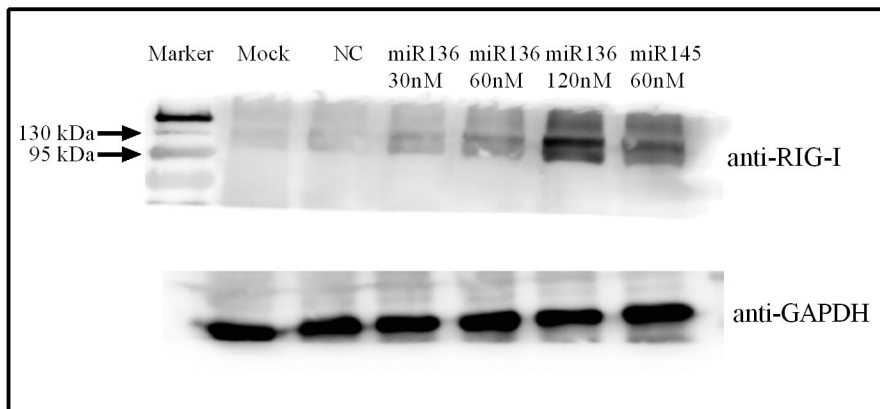

Supplementary Figure S9

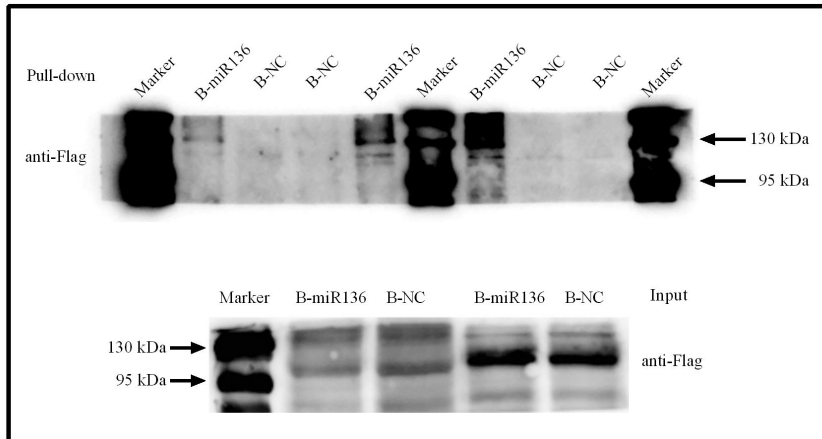

Supplementary Figure S10

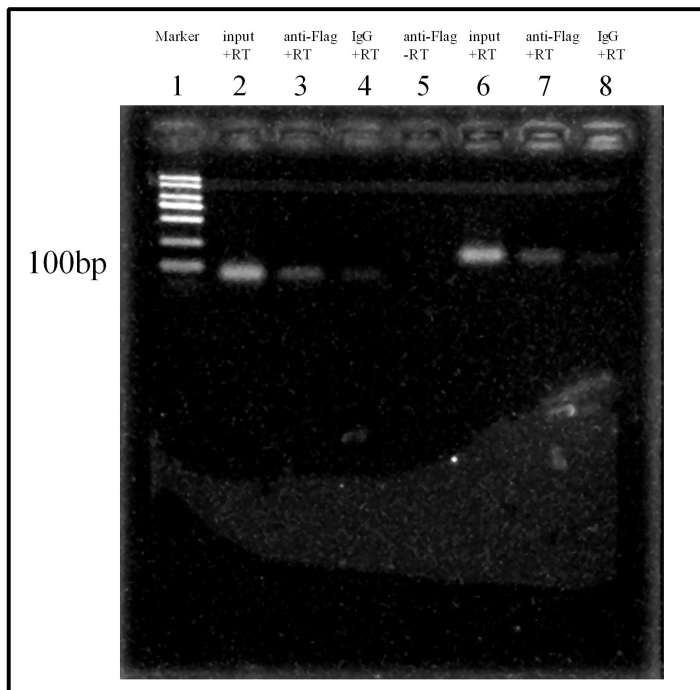

**Supplementary Figure S10.** Original gels of semiquantitative PCR. The molecular weight of putative PCR products was approximately 70 bp. The products in lane 5, 6, 7, and 8 were run delayed when loading the samples.



**Supplementary Table 1 .** List of miRNAs found to be differentially regulated upon H5N1/HM infection in microarray analysis.

| <b>miRNA</b>   | <b>Fold change</b> | <b>t-test</b> |
|----------------|--------------------|---------------|
| hsa-miR-139-3p | 3.98               | 0.031         |
| hsa-miR-136    | 4.96               | 6.84726E-05   |
| hsa-miR-17*    | 2.41               | 0.0013        |
| hsa-miR-196a   | 1.67               | 0.0009        |
| hsa-miR-340    | 0.46               | 0.034         |
| hsa-miR-937    | 0.3                | 0.012         |
| hsa-miR-129*   | 0.58               | 0.003         |

**Supplementary Table 2.** Primers, siRNA and miRNAs used in this study, bases in red were selectively 2'O-methyl modified in some experiments. siRIG-3 sequences, acquired from Williams BR<sup>1</sup>, were used for RIG-I knockdown.

| Name                               | Sequence (5'-3')                                   |
|------------------------------------|----------------------------------------------------|
| miR136 precursor-F                 | TAGAGATCTGATGGCTCCTCCATGTCTTGGAGTAGA               |
| miR136 precursor-R                 | TAGTCTAGAGACCCTGATACTGCCACTTCACAAGAT               |
| IL-63'UTR-F                        | TAGCTCGAGCATGGGCACCTCAGATTGTT                      |
| IL-63'UTR-R                        | TAGGTCGACGCTGAATTTTTTAAAATGCC                      |
| IL-63'UTRDeletion-F                | GTCCACTGGGCACAGAACTAAAAGTATGAGCGT                  |
| IL-63'UTRDeletion-R                | ACGCTCATACTTTTAGTTCTGTGCCCAGTGGAC                  |
| IL-6 3'UTR Mut-F                   | TTCTCTAGAGACAATAAAAAGTAT                           |
| IL-6 3'UTR Mut-R                   | ATACTTTTAGTTGTCTCTAGAGAA                           |
| IL6-F                              | AGGAGACTTGCCTGGTGAAA                               |
| IL6-R                              | CAGGGGTGGTTATTGCATCT                               |
| GAPDH-F                            | GCACCGTCAAGGCTGAGAAC                               |
| GAPDH-R                            | TGGTGAAGACGCCAGTGGA                                |
| IFN-β-F                            | GCTTGGATTCCACAAAAGAAGCA                            |
| IFN-β-R                            | ATAGATGGTCAATGCGGCGTC                              |
| OAS1-F                             | AGCTTCGACTGAGTTCGCTC                               |
| OAS1-R                             | CCAGTCAACTGACCCAGGG                                |
| TNF-α-F                            | GAGGCCAAGCCCTGGTATG                                |
| TNF-α-R                            | CGGGCCGATTGATCTCAGC                                |
| IFN-α-F                            | GCCTCGCCCTTTGCTTTACT                               |
| IFN-α-R                            | CTGTGGGTCTCAGGGAGATCA                              |
| miR136-RT                          | GTCGTATCCAGTGCAGGGTCCGAGGTATTCGCACTGGATACGACTCCATC |
| U6-RT                              | GTCGTATCCAGTGCAGGGTCCGAGGTATTCGCACTGGATACGACAAAATA |
| miR136 Forward primer              | CGCCACTCCATTGTTTGA                                 |
| U6 Forward primer                  | CTCGCTTCGGCAGCACATA                                |
| Universal reverse primer           | GTGCAGGGTCCGAGGT                                   |
| hsa-mir-136 mimic forward          | ACUCCAUUUGUUUUGAUGAUGGA                            |
| hsa-mir-136 mimic reverse          | CAUCAUAAAACAAAUGGAGUUU                             |
| hsa-mir-29a mimic forward          | UAGCACCAUCUGAAAUCGGUUA                             |
| hsa-mir-29a mimic reverse          | ACCGAUUUCAGAGAUGGUGCUAAU                           |
| hsa-mir-145 mimic forward          | GUCCAGUUUCCAGGAAUCCCU                              |
| hsa-mir-145 mimic reverse          | GGAUUCCUGGGAAAACUGGACTT                            |
| Negative Control mimic forward     | UUCUCCGAACGUGUCACGUUU                              |
| Negative Control mimic reverse     | ACGUGACACGUUCGGAGAAUU                              |
| siRIG-I sense                      | pGCCAGUGGAGAUCACAAUAUUCUga                         |
| siRIG-I antisense                  | UCAGAAUAUUGUGAUCUCCACUGGCUU                        |
| siRNA control forward              | UUCUCCGAACGUGUCACGUUU                              |
| siRNA control reverse              | ACGUGACACGUUCGGAGAAUU                              |
| miR-136 inhibitor                  | UCCAUCAUAAAACAAAUGGAGU                             |
| miR-136 inhibitor negative control | CAGUACUUUUGUGUAGUACAA                              |

**Supplementary Table 3.** Putative target genes of miR-136 (genes in red are closely related to IAV replication).

| Gene Symbol | Genes identifier | miRanda | picTar | PITA | RNA22 | Targetscan |
|-------------|------------------|---------|--------|------|-------|------------|
| ADIPOR2     | 79602            | √       | √      |      | √     |            |
| AKAP11      | 11215            | √       |        |      |       |            |
| AMOTL1      | 154810           | √       |        |      |       |            |
| ATF2        | 1386             | √       |        |      |       |            |
| BTBD3       | 22903            | √       |        |      | √     |            |
| C6orf62     | 81688            | √       |        |      |       |            |
| CADM1       | 23705            | √       |        |      |       |            |
| CALM2       | 805              | √       | √      |      | √     |            |
| CLIC4       | 25932            | √       |        |      |       |            |
| CTNNB1      | 1499             | √       |        |      |       |            |
| DUSP16      | 80824            | √       |        | √    |       |            |
| DYRK1A      | 1859             | √       |        |      |       |            |
| E2F1        | 1869             | √       |        | √    |       | √          |
| FOXJ3       | 22887            | √       |        |      | √     |            |
| GOLT1B      | 51026            | √       |        |      | √     |            |
| HOXC10      | 3226             | √       | √      | √    |       | √          |
| IL-6        | 3569             | √       |        |      |       |            |
| KLF4        | 9314             | √       |        |      |       |            |
| KPNB1       | 3837             | √       |        |      |       |            |
| KRAS        | 3845             | √       |        |      |       |            |
| LCOR        | 84458            | √       |        | √    |       |            |
| MAP2K4      | 6416             | √       |        |      |       |            |
| MAZ         | 4150             | √       |        |      |       |            |
| MED12       | 9968             | √       |        |      |       |            |
| MINK1       | 50488            | √       |        |      |       |            |
| MSL2        | 55167            | √       | √      | √    |       |            |
| MTPN        | 136319           | √       | √      |      |       |            |
| NFE2L1      | 4779             | √       |        |      |       |            |
| NMT1        | 4836             | √       |        | √    |       |            |
| PAFAH1B1    | 5048             | √       |        | √    |       |            |
| PNRC2       | 55629            | √       |        |      |       | √          |
| PPP1R14C    | 81706            | √       |        | √    |       |            |
| PURB        | 5814             | √       | √      | √    |       | √          |
| RAB14       | 51552            | √       |        |      |       |            |
| RAD23B      | 5887             | √       |        | √    |       | √          |
| RFX7        | 64864            | √       |        |      |       |            |
| RGS16       | 6004             | √       |        | √    |       |            |
| RNF2        | 6045             | √       |        | √    |       |            |
| RPUSD4      | 84881            | √       |        |      |       | √          |
| SFRS1       | 6426             | √       | √      | √    |       | √          |
| SNAPC1      | 6617             | √       |        |      |       | √          |
| TMBIM6      | 7009             | √       |        | √    |       |            |
| TMEM33      | 55161            | √       |        | √    |       |            |

1. Marques, JT. et al. A structural basis for discriminating between self and nonself double-stranded RNAs in mammalian cells. *Nat Biotechnol*; **24**: 559-565. (2006)
